# Supplementary material for: Fluorescent macrocyclic probes with pendant functional groups as markers of acidic organelles within live cells
Source: Royal Society of Chemistry journal article supplement (doi:10.1039/c3ob41773e), 2013-11-13
Supplement: c3ob41773e.pdf [file c3ob41773e.pdf]

**Fluorescent macrocyclic probes with pendant functional groups as  
markers of acidic organelles within live cells**

*Prashant D. Wadhavane,<sup>†</sup> M. Ángeles Izquierdo,<sup>†</sup> Dennis Lutters,<sup>†</sup> M. Isabel Burguete,<sup>†</sup>  
María J. Marín,<sup>‡</sup> David A. Russell,<sup>‡</sup> Francisco Galindo<sup>†,\*</sup> and Santiago V. Luis<sup>†,\*</sup>*

<sup>†</sup>Universitat Jaume I, Departamento de Química Inorgánica y Orgánica,  
Av. Sos Baynat, s/n, E-12071 Castellón (Spain)

<sup>‡</sup>School of Chemistry, University of East Anglia, Norwich, Norfolk NR4 7TJ (UK)

E-mail: [francisco.galindo@uji.es](mailto:francisco.galindo@uji.es), [luis@uji.es](mailto:luis@uji.es)

**Supporting Information**

|                                                  |     |
|--------------------------------------------------|-----|
| Spectroscopic characterization of compounds..... | S2  |
| Photophysical characterization of compounds..... | S12 |
| Microscopic characterization of compounds.....   | S13 |

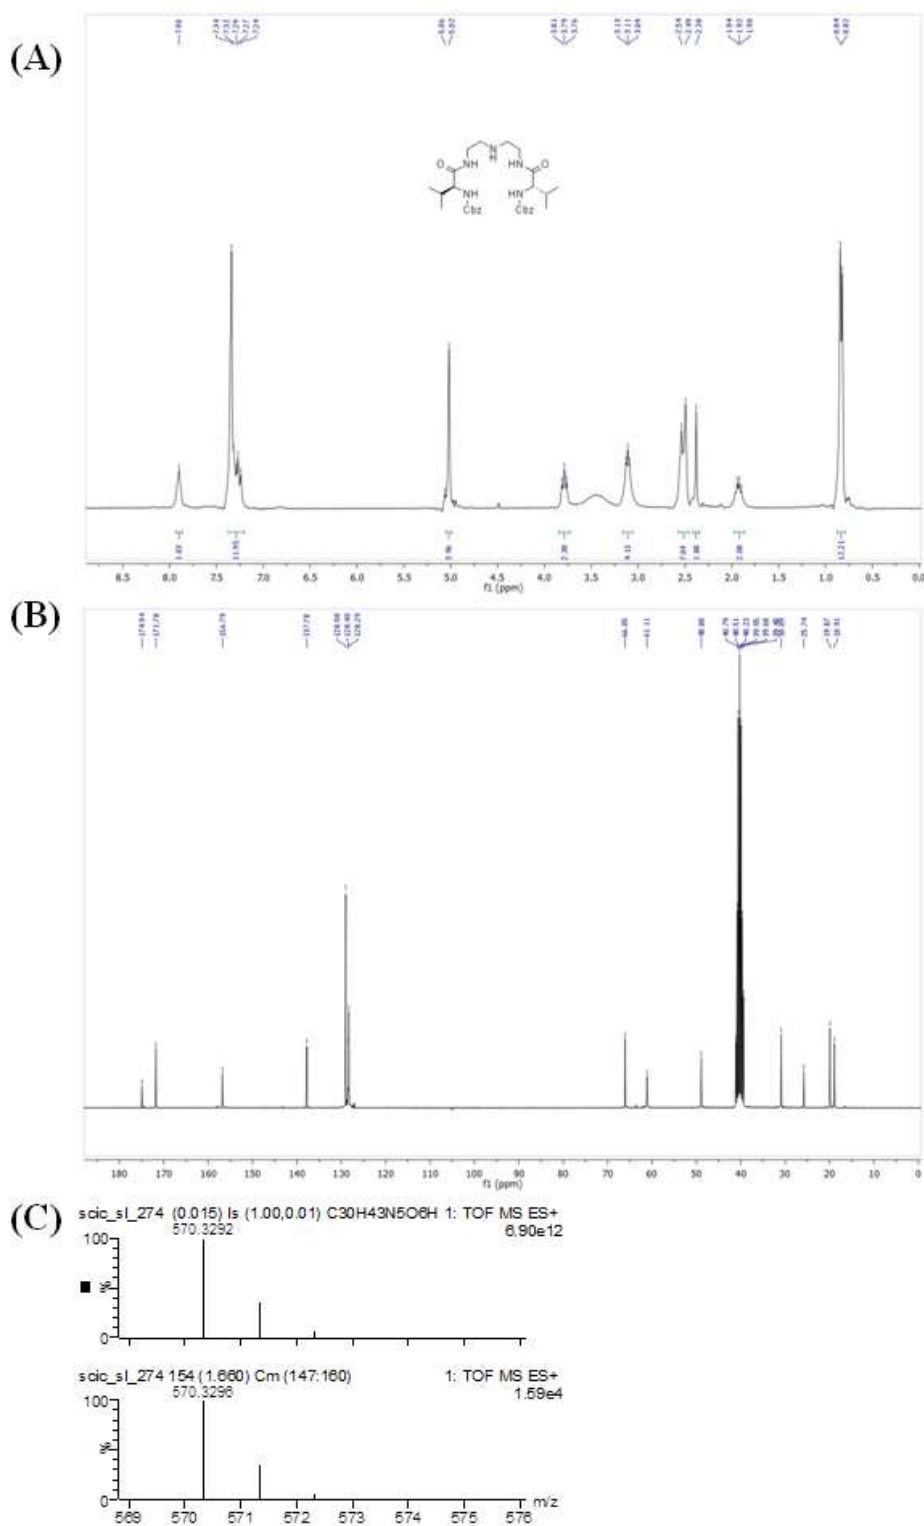

**Figure S-1.** A)  $^1\text{H}$  NMR spectrum of compound **8** in  $\text{DMSO-}d_6$ . B)  $^{13}\text{C}$  NMR spectrum of compound **8** in  $\text{DMSO-}d_6$ . C) ESI-TOF spectrum of compound **8** and simulated pattern for  $[\text{M}+\text{H}]^+$ .

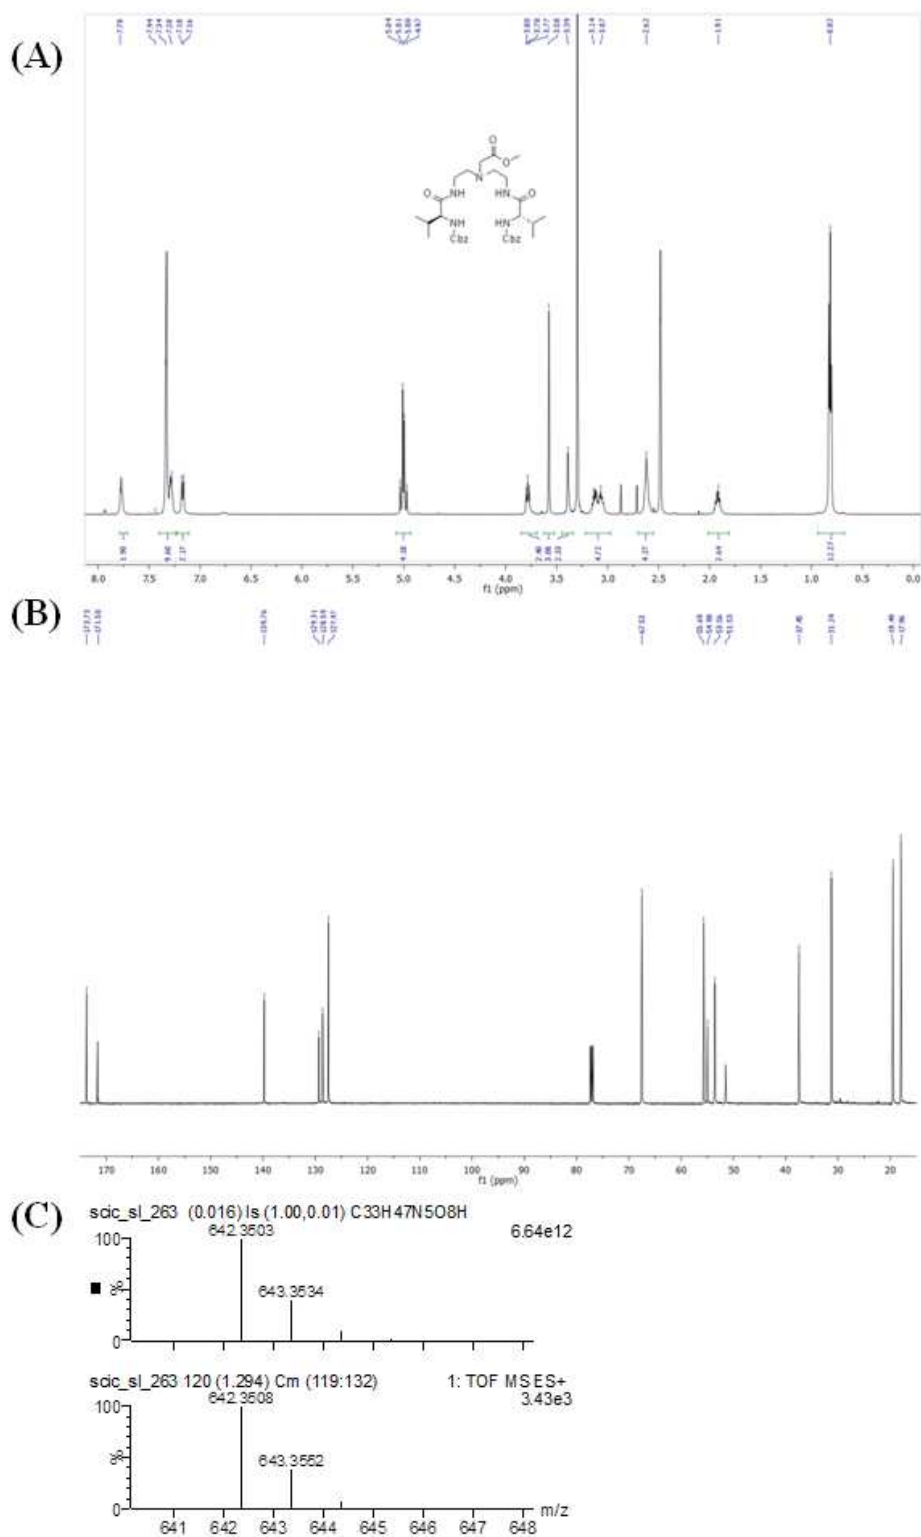

**Figure S-2.** A)  $^1\text{H}$  NMR spectrum of compound **9** in  $\text{DMSO}-d_6$ . B)  $^{13}\text{C}$  NMR spectrum of compound **9** in  $\text{CDCl}_3$ . C) ESI-TOF spectrum of compound **9** and simulated pattern for  $[\text{M}+\text{H}]^+$ .

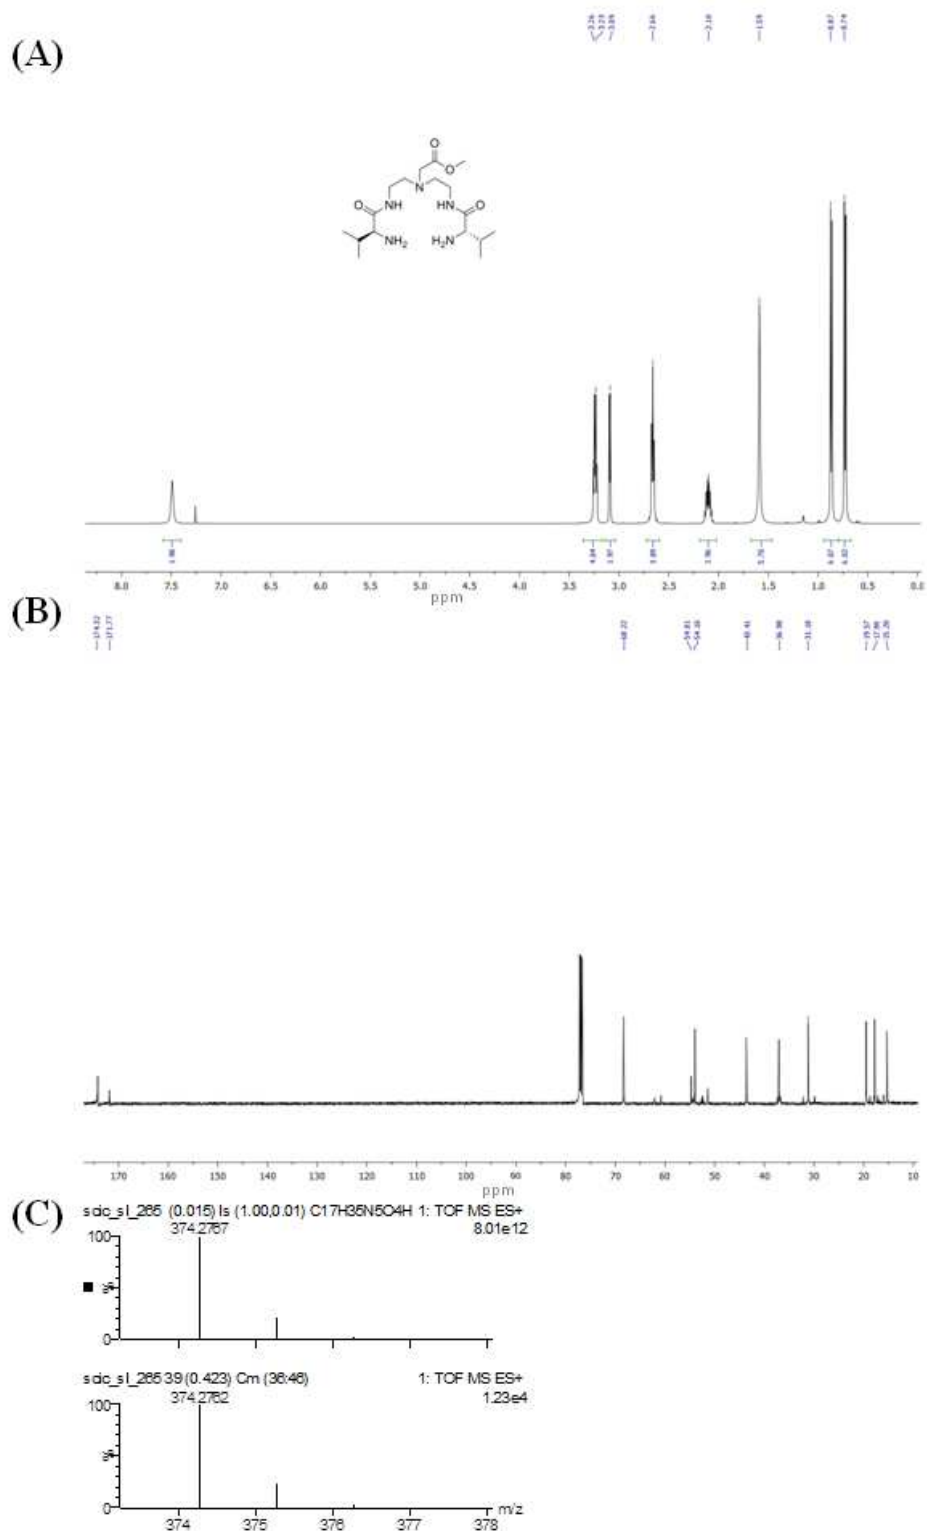



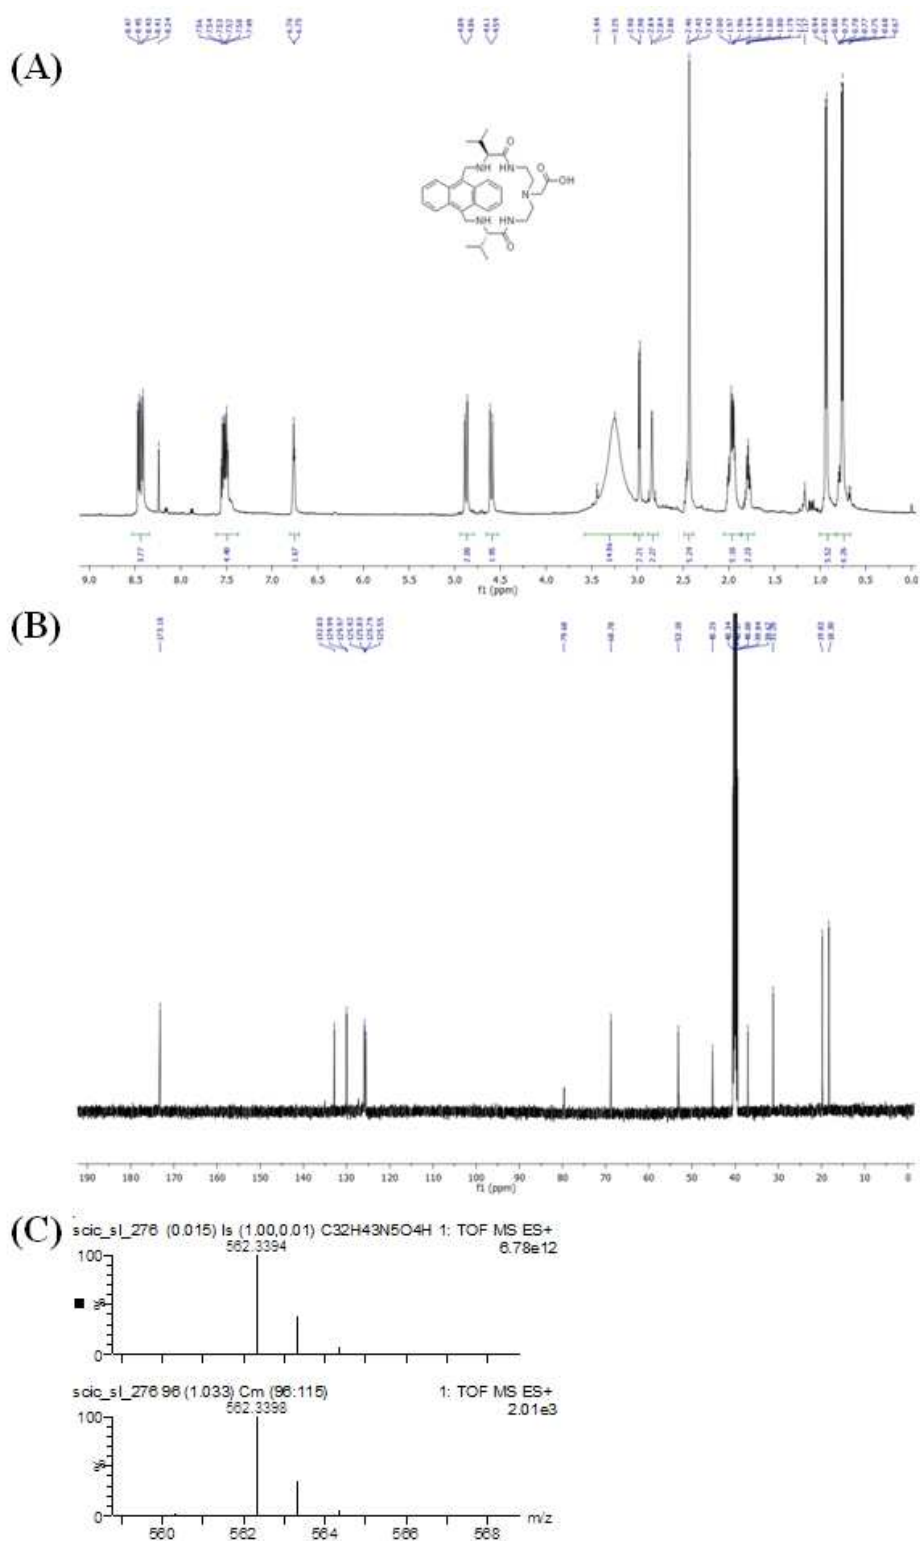

**Figure S-5.** A)  $^1\text{H}$  NMR spectrum of compound **2** in  $\text{DMSO-}d_6$ . B)  $^{13}\text{C}$  NMR spectrum of compound **2** in  $\text{DMSO-}d_6$ . C) ESI-TOF spectrum of compound **2** and simulated pattern for  $[\text{M}+\text{H}]^+$ .

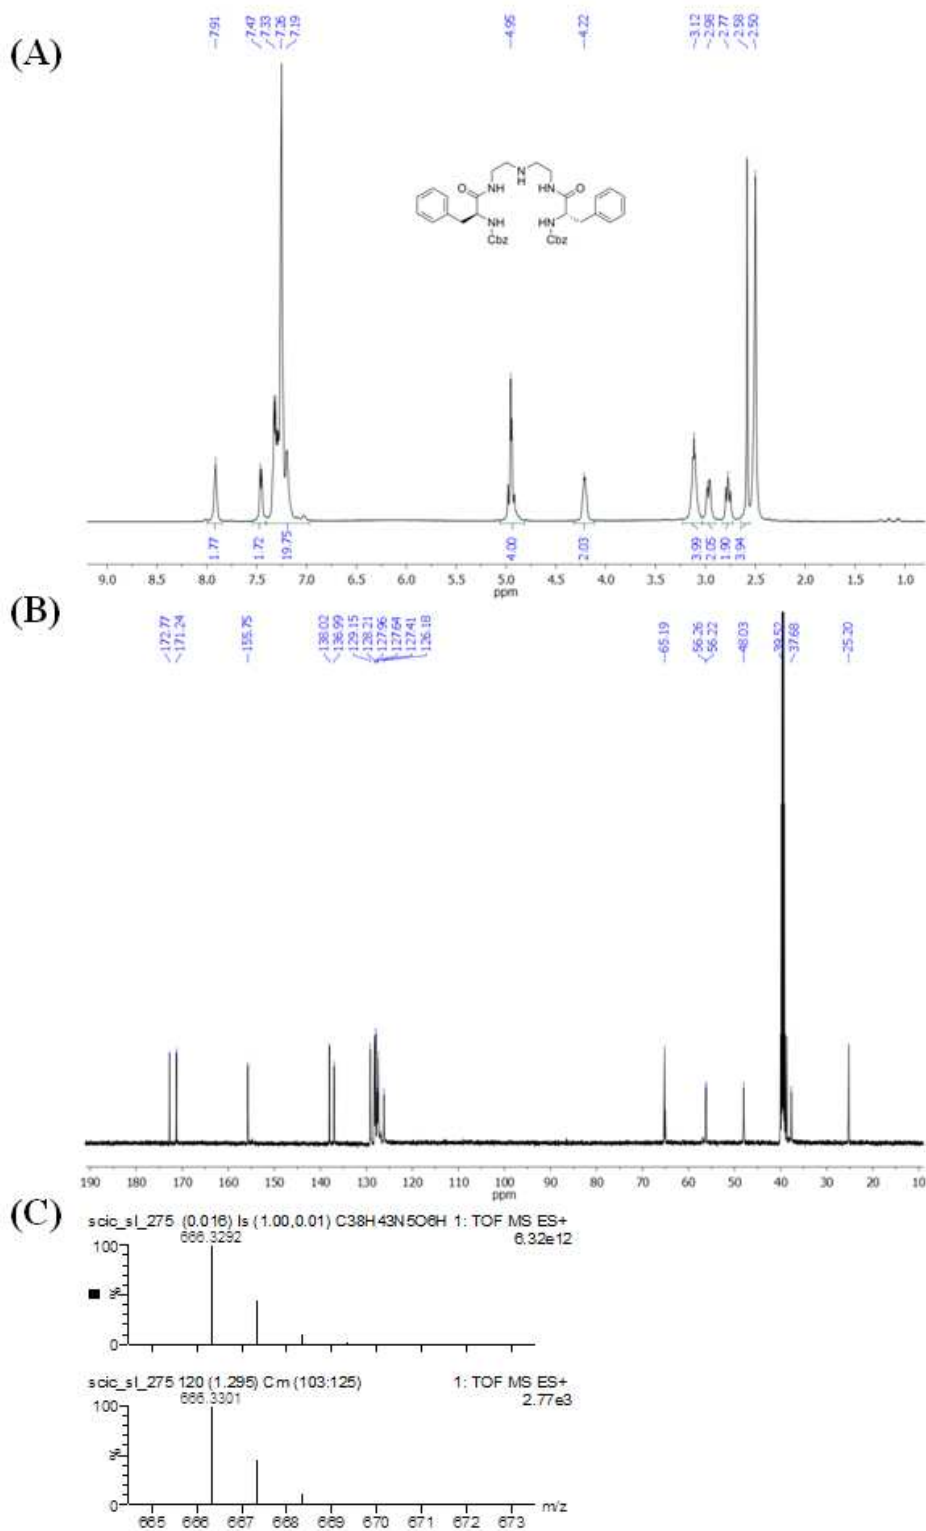

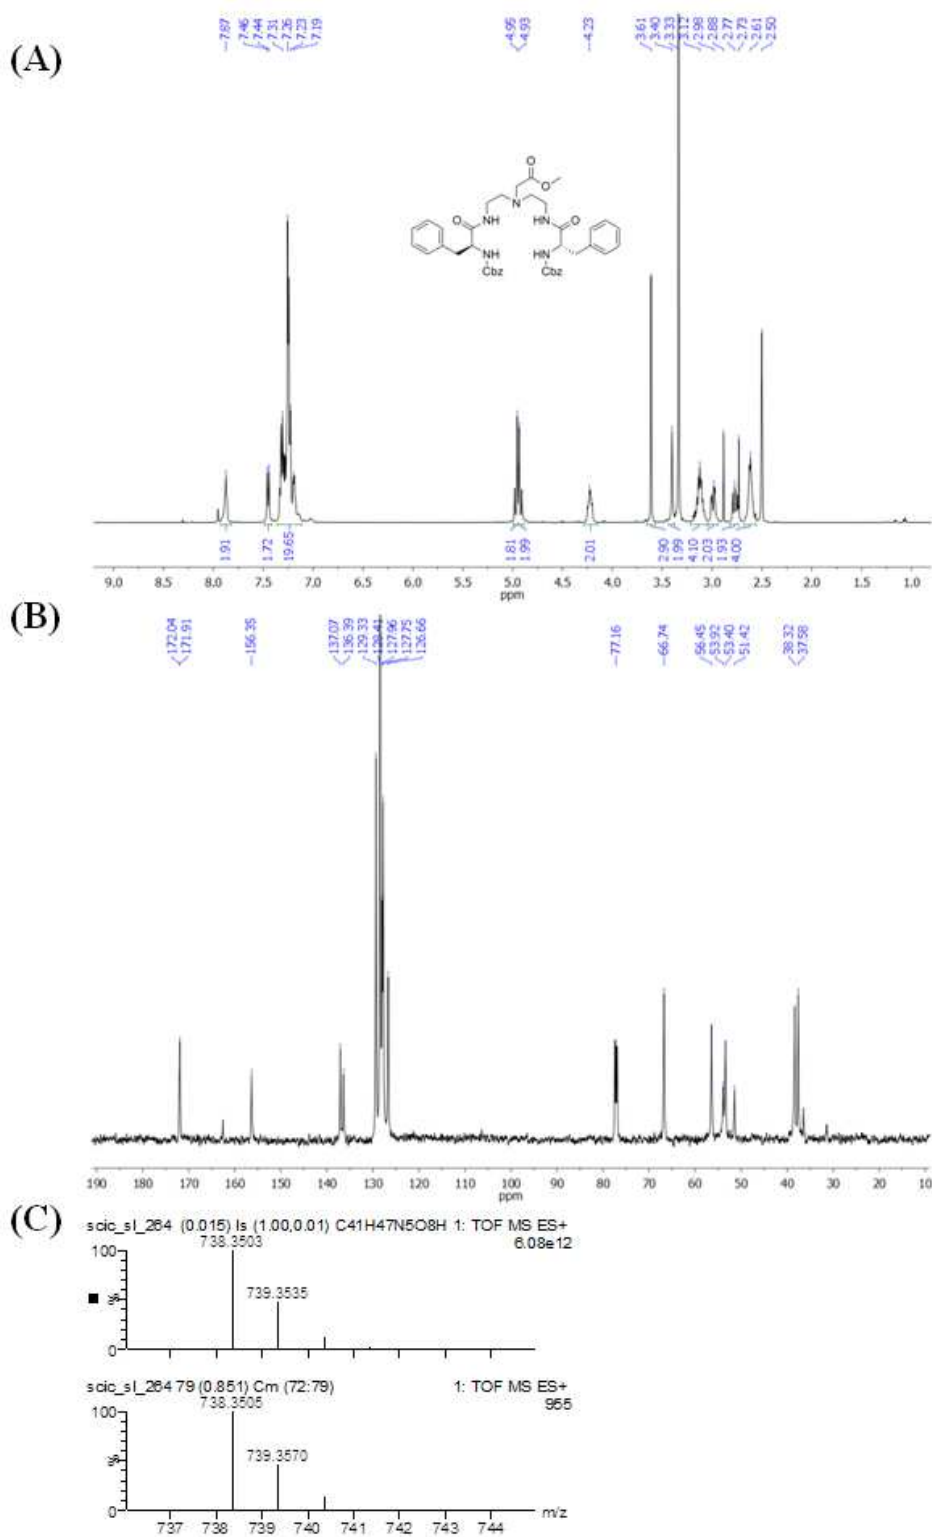



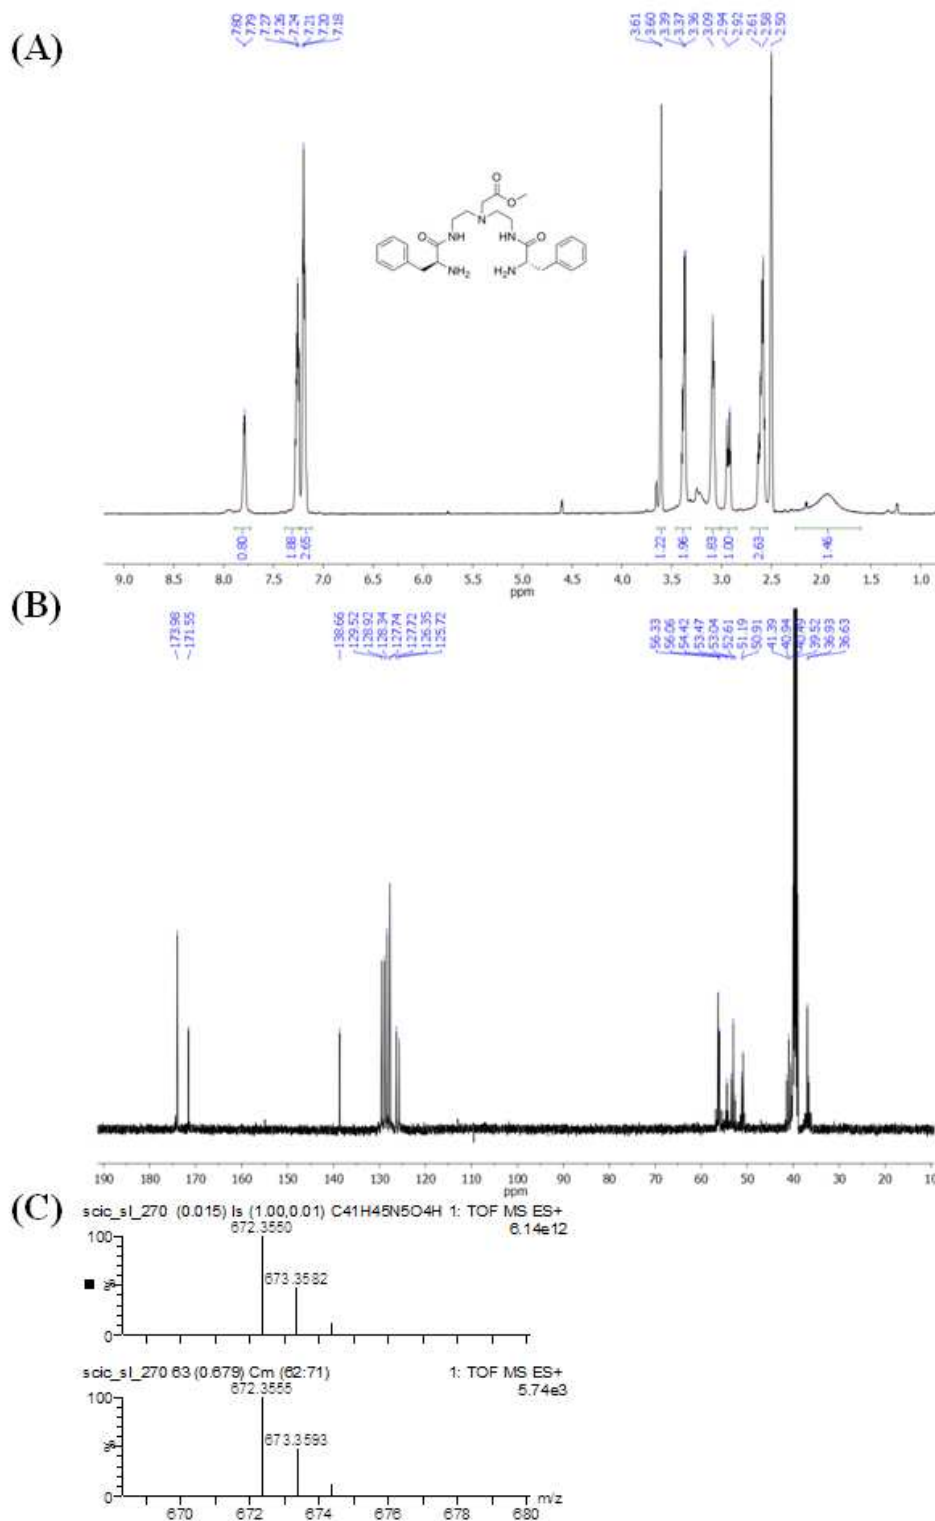

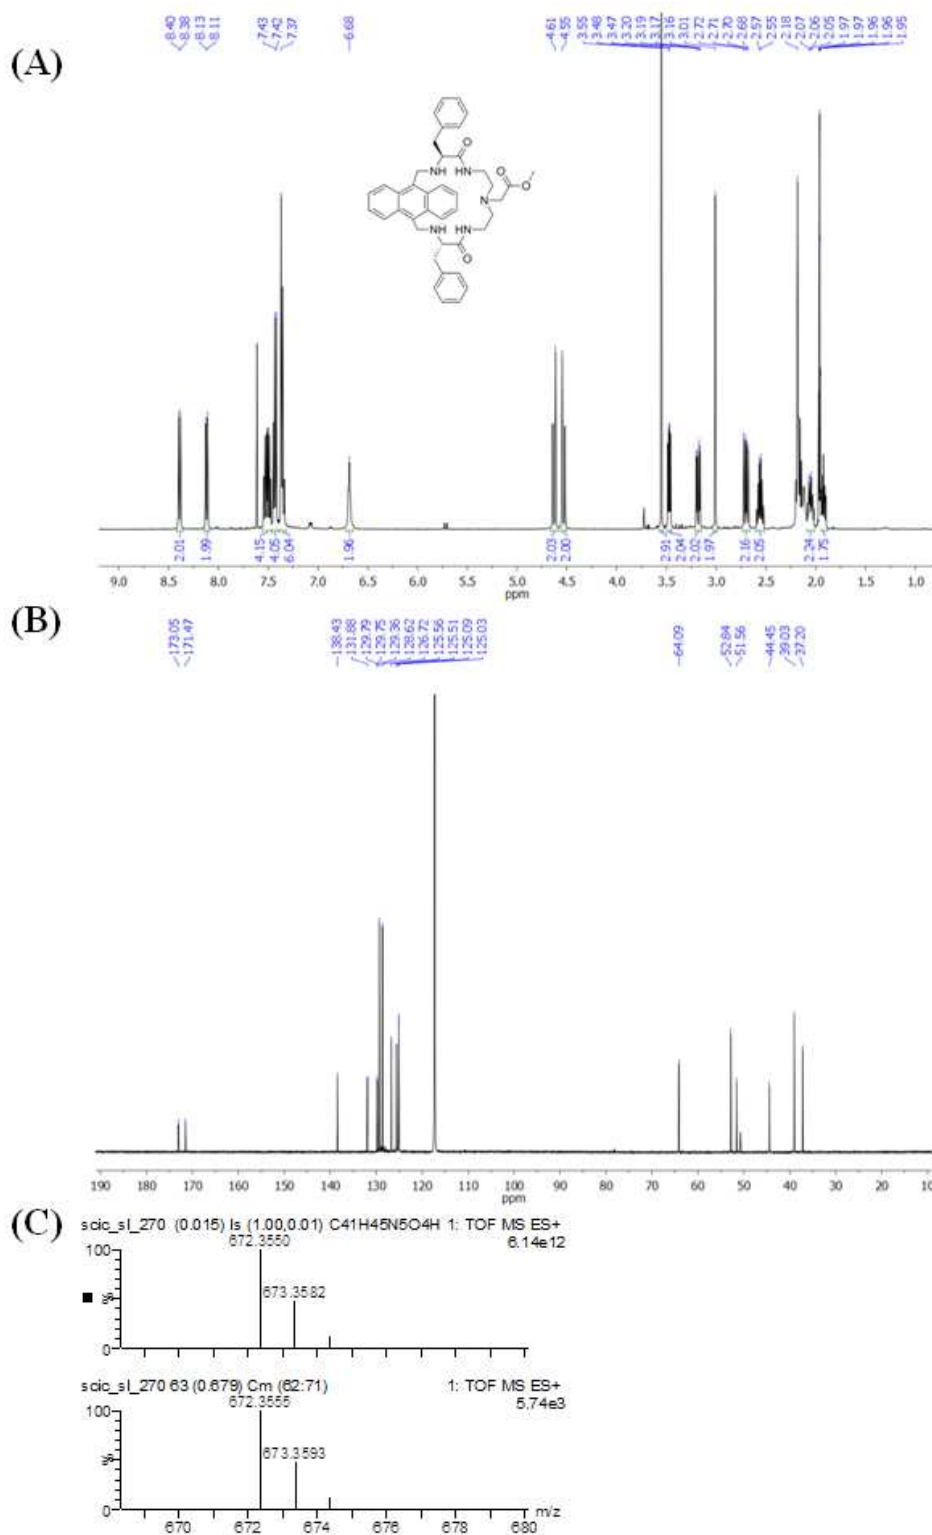

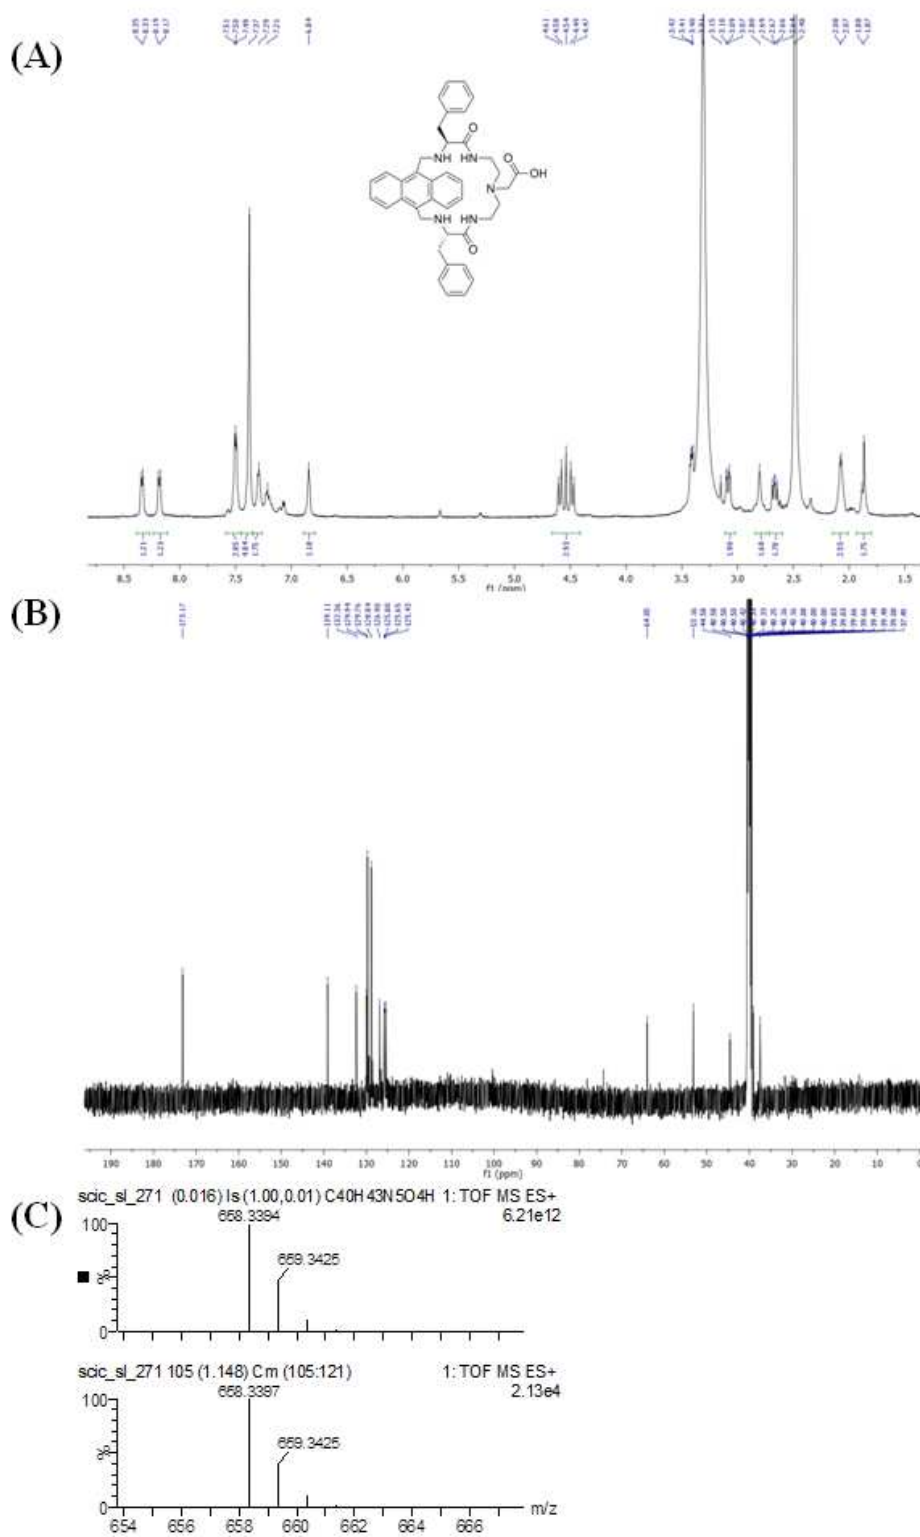

**Figure S-10.** A)  $^1\text{H}$  NMR spectrum of compound **4** in  $\text{DMSO-}d_6$ . B)  $^{13}\text{C}$  NMR spectrum of compound **4** in  $\text{DMSO-}d_6$ . C) ESI-TOF spectrum of compound **4** and simulated pattern for  $[\text{M}+\text{H}]^+$ .

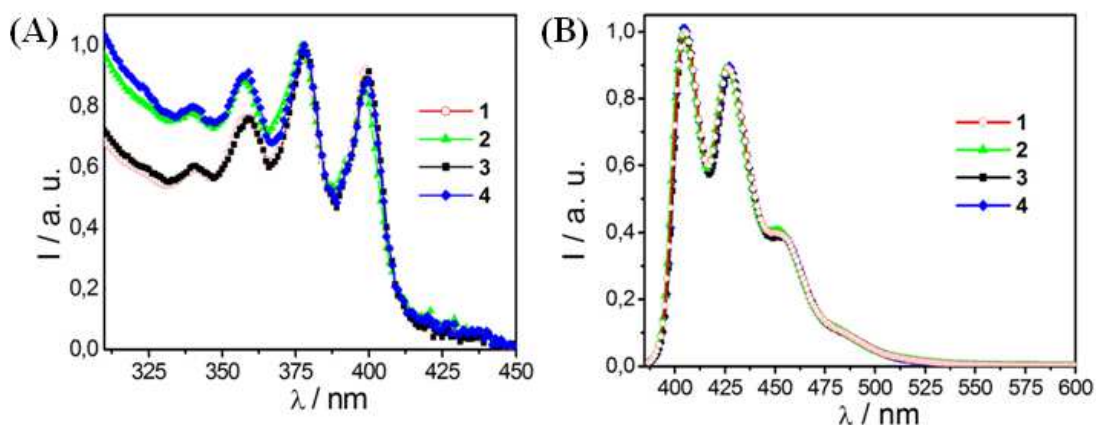

**Figure S-11.** **A)** Normalized absorption spectra of the anthracenophanes **1-4** in H<sub>2</sub>O (0.2% DMSO) at pH 1.7, probe concentration 2  $\mu$ M. **B)** Normalized emission spectra of the anthracenophanes **1-4** in H<sub>2</sub>O (0.2% DMSO) at pH 1.7, probe concentration 2  $\mu$ M,  $\lambda_{\text{exc}} = 374$  nm.

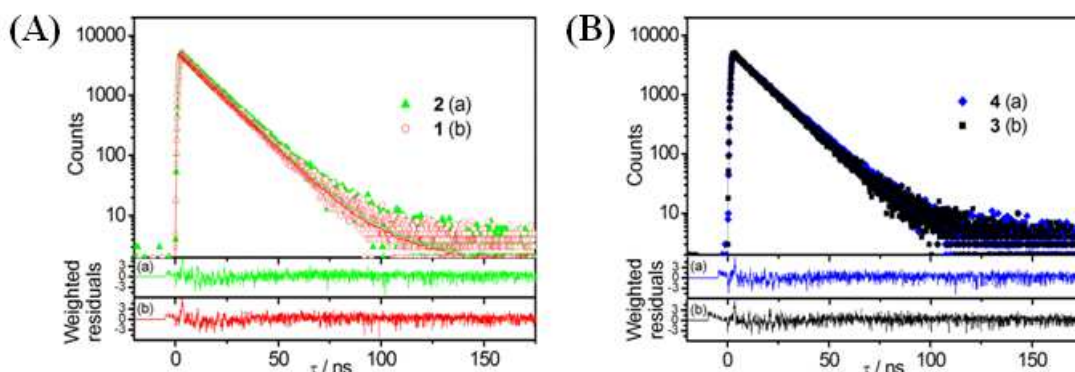

**Figure S-12.** Fluorescence decay traces of the anthracenophanes; **A)** **1** and **2**, and **B)** **3** and **4** in H<sub>2</sub>O (0.2% DMSO) at pH 1.7 ( $\lambda_{\text{exc}} = 372$  nm,  $\lambda_{\text{em}} = 420$  nm). Probe concentration 2  $\mu$ M.

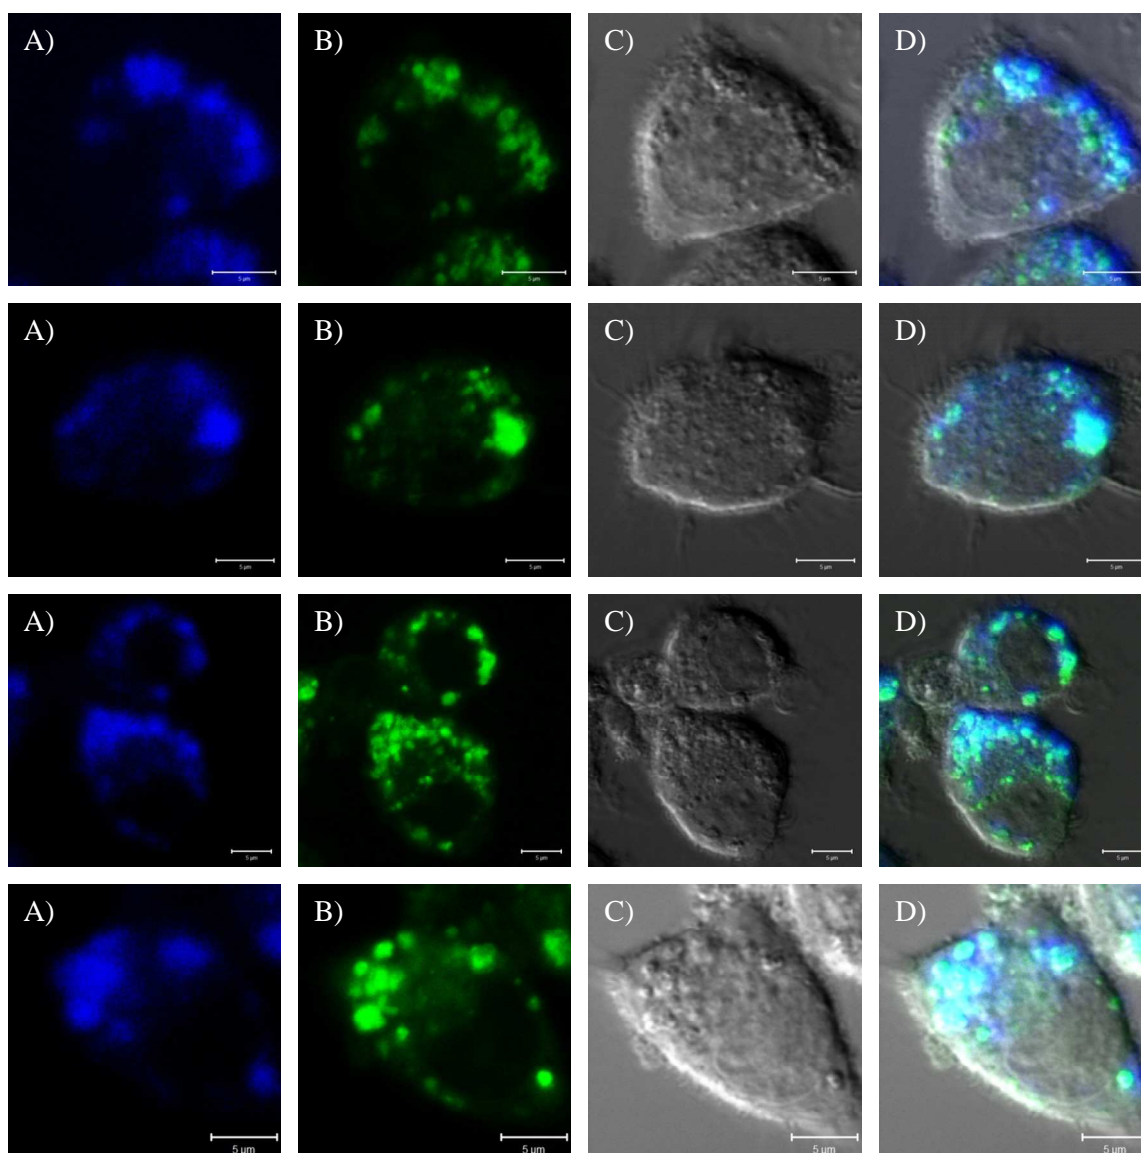

**Figure S-13.** Distribution and colocalization experiments with probe **2** and LysoSensor Green DND-189. **A)** Fluorescence images of the compound **2**, collected with a confocal laser scanning microscope in the blue channel **B)** Fluorescence images of the DND-189 probe collected with a confocal laser scanning microscope in the green channel. **C)** Differential interference contrast (DIC) images collected with a confocal laser scanning microscope in the DIC mode. **D)** Composite images of blue, green and DIC channels.

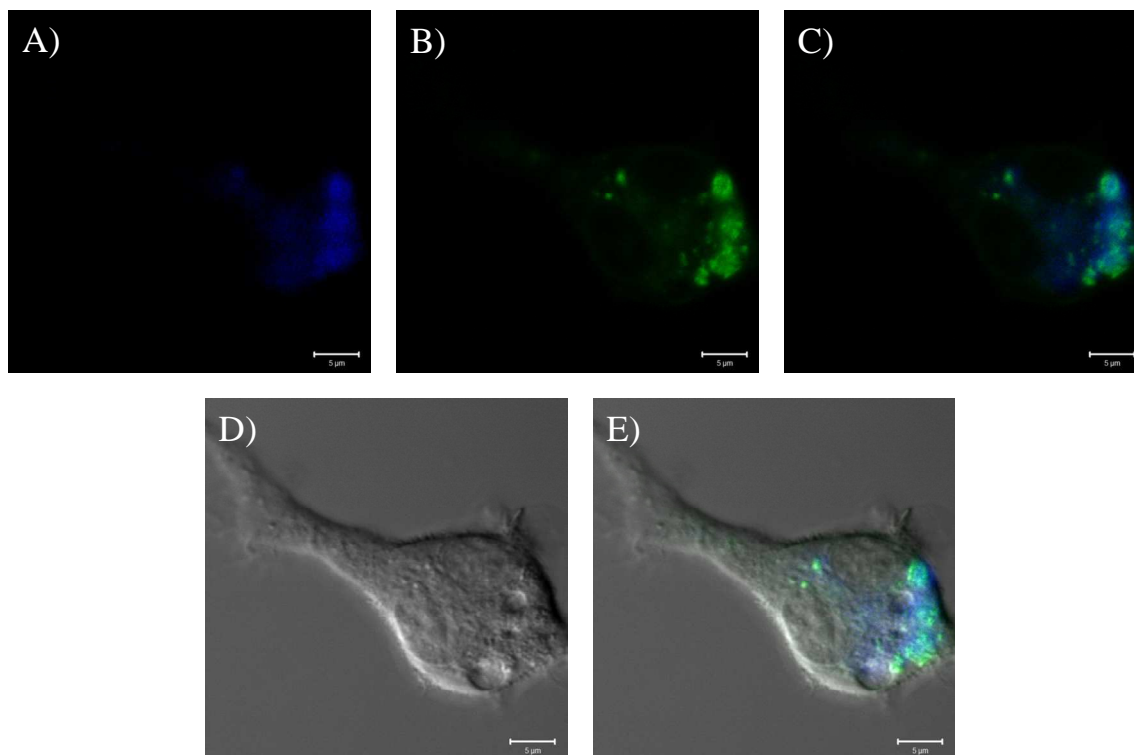

**Figure S-14.** Distribution and colocalization experiments with probe **1** and LysosSensor Green DND-189. **A)** Fluorescence image of the compound **1**, collected with a confocal laser scanning microscope in the blue channel. **B)** Fluorescence image of the DND-189 probe collected with a confocal laser scanning microscope in the green channel. **C)** Merged image of the blue and the green channels. **D)** DIC image collected with a confocal laser scanning microscope in the DIC mode. **E)** Composite image of blue, green and DIC channels.

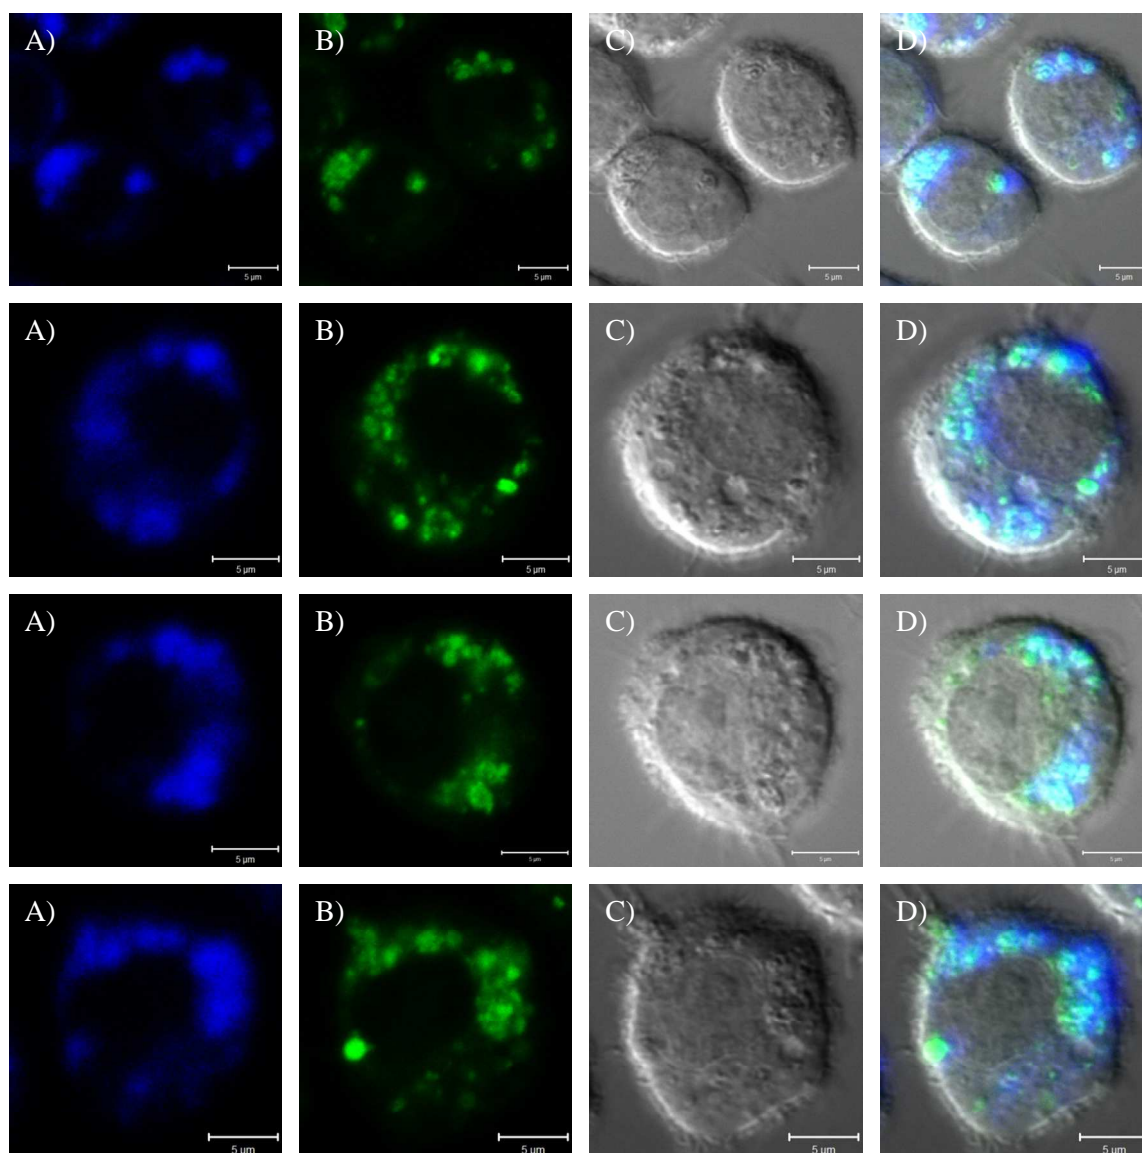

**Figure S-15.** Distribution and colocalization experiments with probe **1** and LysoSensor Green DND-189. **A)** Fluorescence images of the compound **1**, collected with a confocal laser scanning microscope in the blue channel. **B)** Fluorescence images of the DND-189 probe collected with a confocal laser scanning microscope in the green channel. **C)** DIC images collected with a confocal laser scanning microscope in the DIC mode. **D)** Composite images of blue, green and DIC channels.

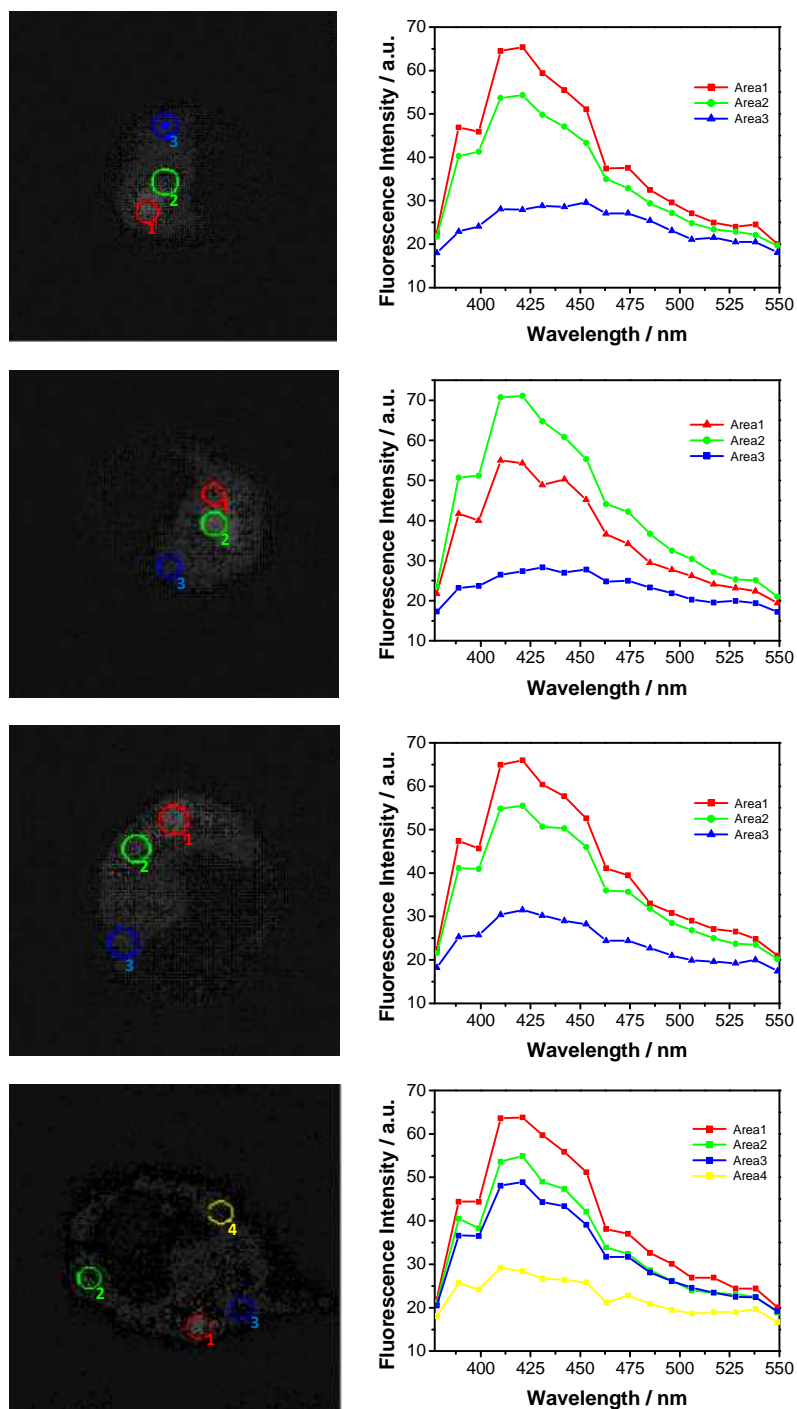

**Figure S-16.** Fluorescence emission spectra of probe **2** from within the intracellular environment.



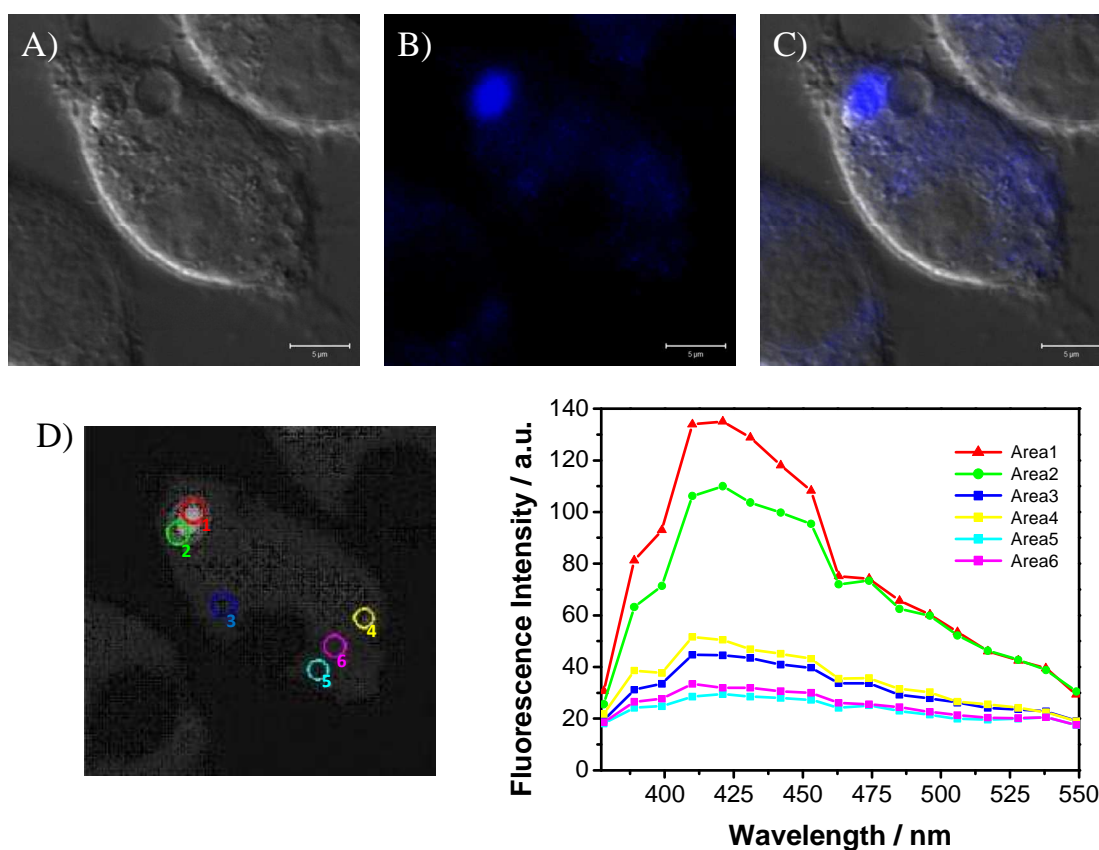

**Figure S-17.** Intracellular emission spectra of probe **1**. **A)** DIC image was collected with a confocal microscope in the DIC mode. **B)** Fluorescence image of **1** was collected with a confocal microscope in the blue channel. **C)** Composite image of blue and DIC channels. **D)** Fluorescence spectra of compound **1** inside the cell selecting different areas within the cell.

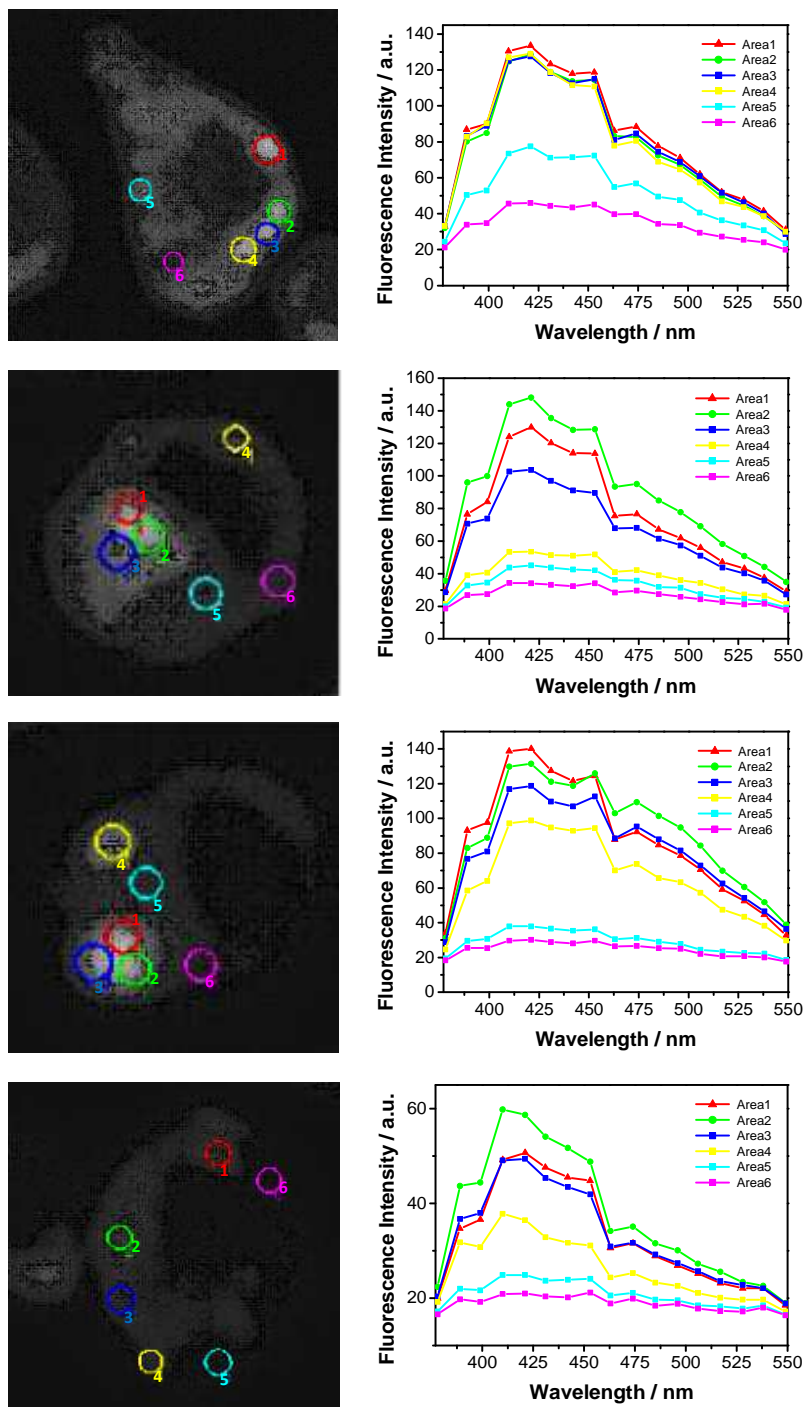

**Figure S-18.** Fluorescence emission spectra of probe **1** from within the intracellular environment.
